# Supplementary material for: DOT1L inhibition reveals a distinct subset of enhancers dependent on H3K79 methylation
Source: PubMed Central journal article supplement (PMC6594956; doi:10.1038/s41467-019-10844-3), 2019-06-26
Supplement: 41467_2019_10844_MOESM1_ESM.pdf [file 41467_2019_10844_MOESM1_ESM.pdf]

# **DOT1L inhibition reveals a distinct subset of enhancers dependent on H3K79 methylation**

## **Supplementary information**

Godfrey et al.

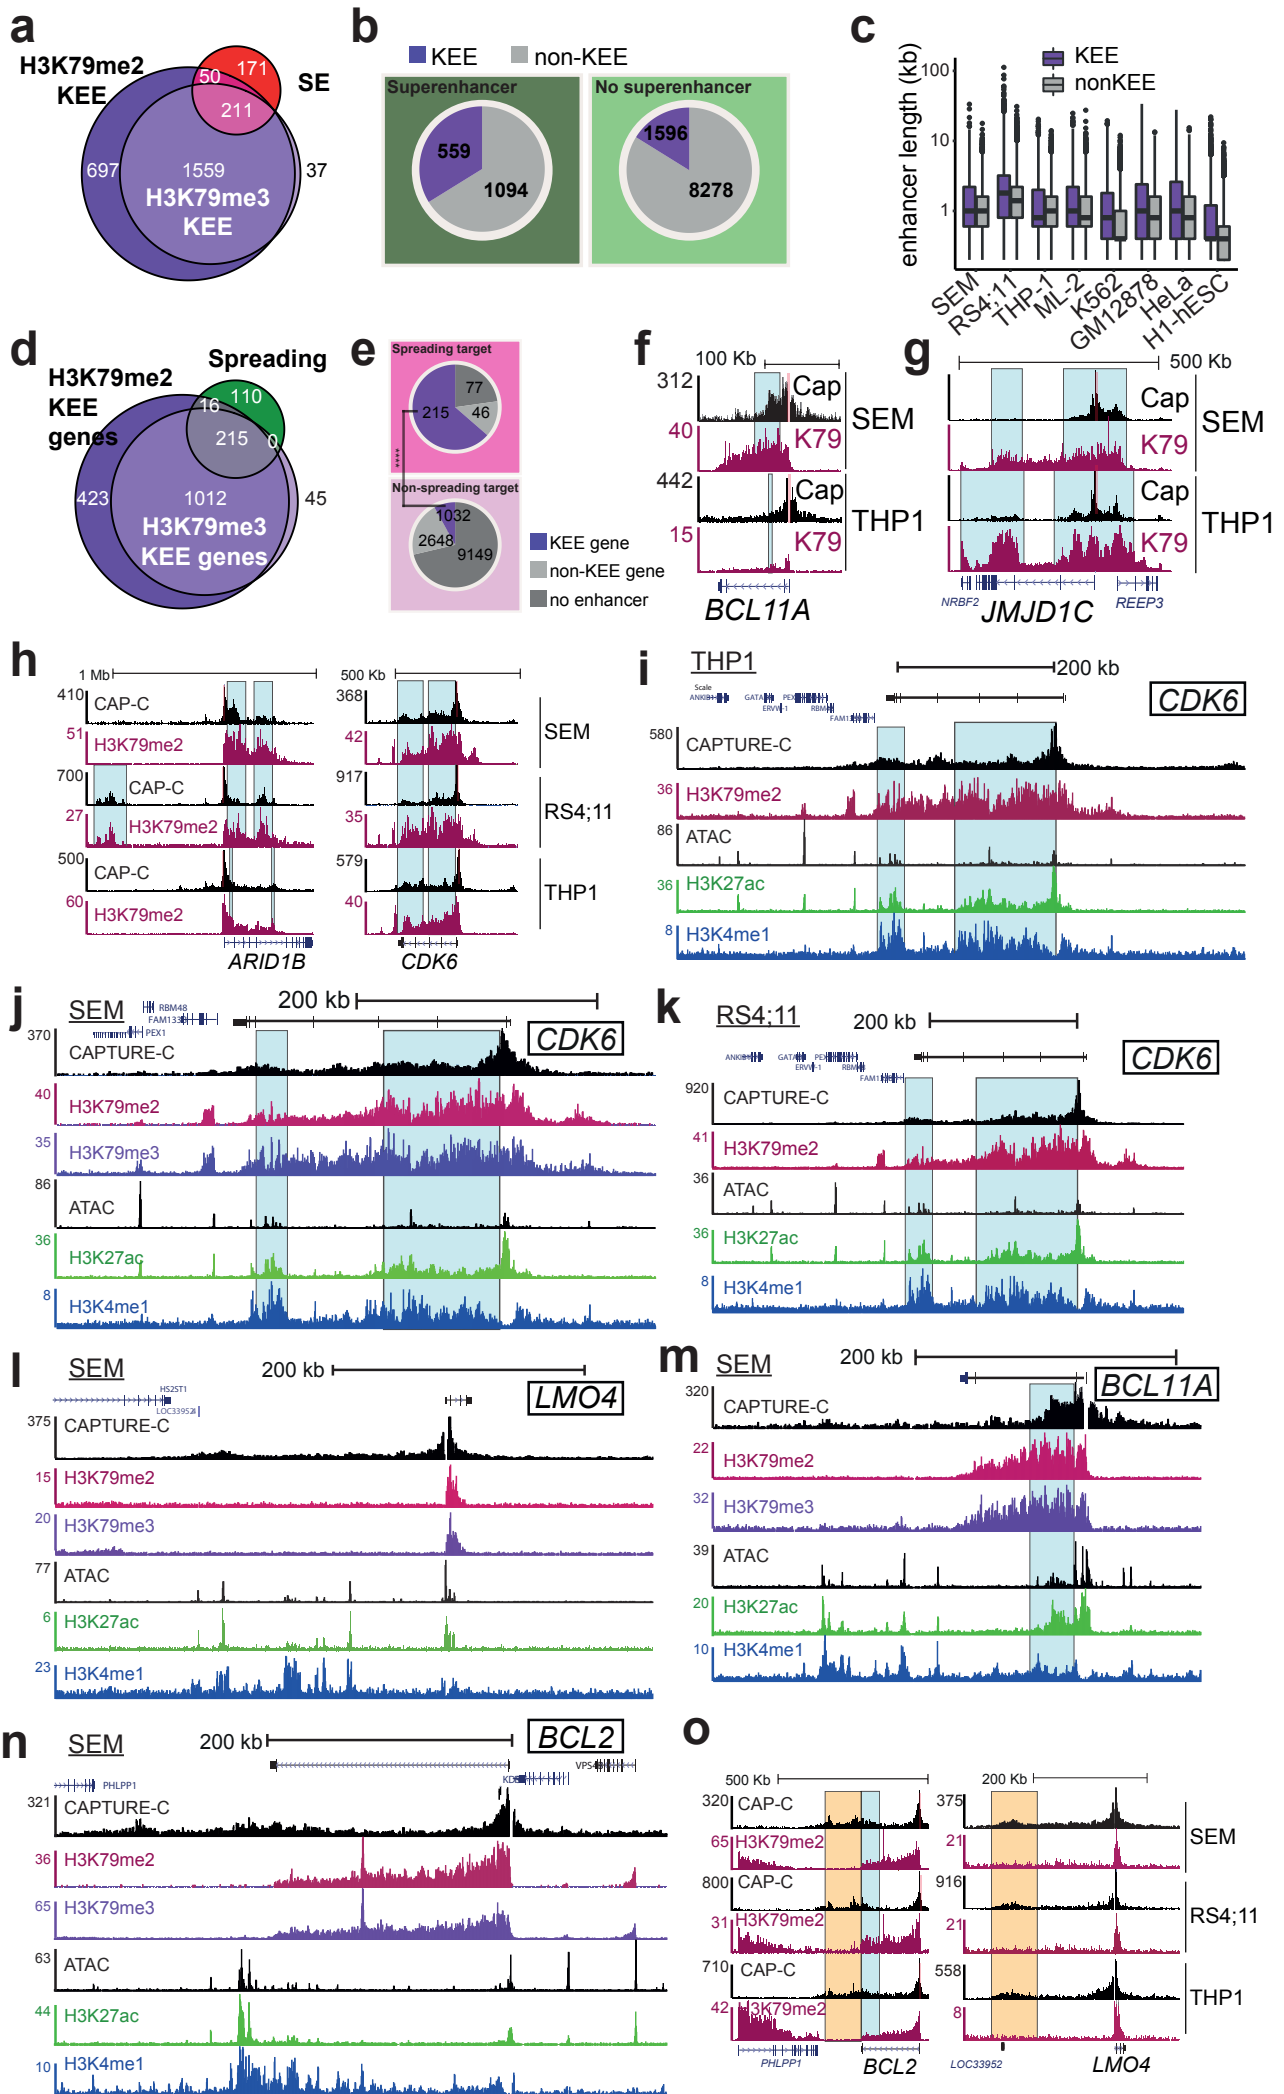

**Supplementary Figure 1.** H3K79me<sub>2/3</sub> marks a subset of enhancers **(a)** Overlap between KEEs identified using H3K79me<sub>2</sub> and H3K79me<sub>3</sub> ChIP-seq in SEM cells and super-enhancers (SE). Numbers inside the red circle reflect the number of super-enhancers within each overlap group. **(b)** Number of KEEs and non-KEEs that overlap with super-enhancers or non-super-enhancers. **(c)** Lengths of KEEs (purple) and non-KEEs (gray) in different cell types. Box plots show interquartile range; center line represents the median value. **(d)** Overlap between KEE-genes identified using H3K79me<sub>2</sub> and H3K79me<sub>3</sub> ChIP-seq in SEM cells and spreading target genes. **(e)** Proportion of MLL-AF4 spreading genes that are also a KEE-gene (purple), non-KEE-gene (light gray), or not annotated with an enhancer (dark gray) (\*\*\*\* =  $p < 0.0001$ , Fisher's exact test) in SEM cells. **(f-g)** Capture-C signal and level of H3K79me<sub>2</sub> at *BCL11A* and *JMJD1C* in SEM and THP1 cells. Blue boxes represent KEE regions, red line shows location of Capture-C probe. **(h)** Capture-C and H3K79me<sub>2</sub> ChIP-seq in SEM, RS4;11 and THP1 cells at *ARID1B* and *CDK6*. Blue boxes represent KEE regions. **(i-k)** Capture-C, ChIP-seq and ATAC-seq at *CDK6* in THP1, SEM and RS4;11 cells. Blue boxes represent KEE regions **(l)** Capture-C, ChIP-seq and ATAC-seq at *LMO4* in SEM cells. **(m)** Capture-C, ChIP-seq and ATAC-seq at *BCL11A* in SEM cells. **(n)** Capture-C, ChIP-seq and ATAC-seq at *BCL2* in SEM cells. **(o)** Capture-C and H3K79me<sub>2</sub> ChIP-seq in SEM, RS4;11 and THP1 cells at *BCL2* and *LMO4*. Blue boxes represent KEE regions, orange boxes represent non-KEE regions.

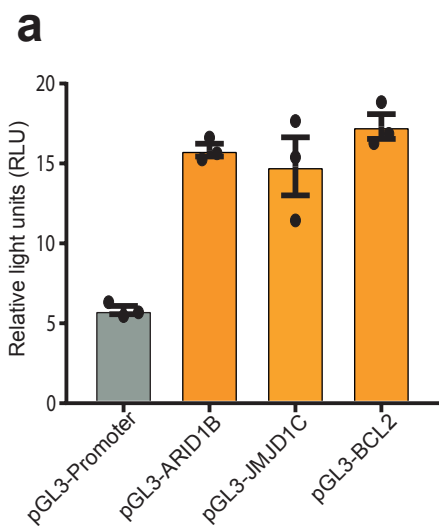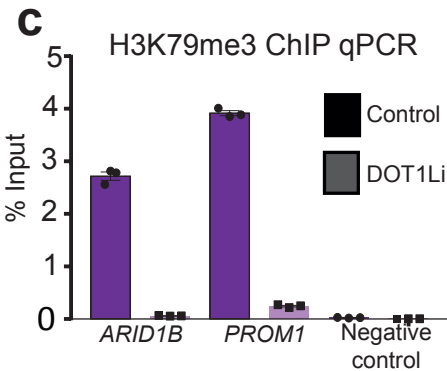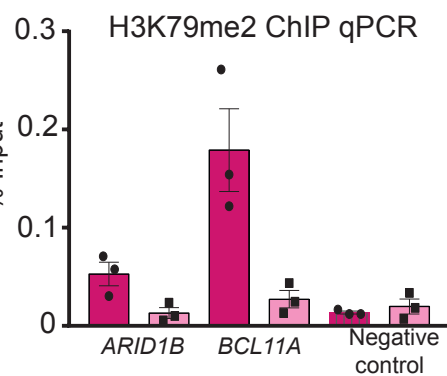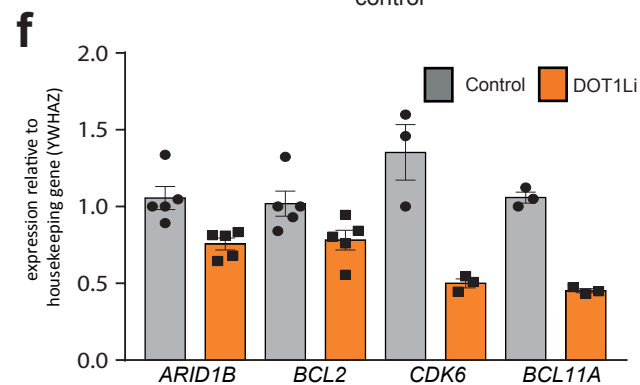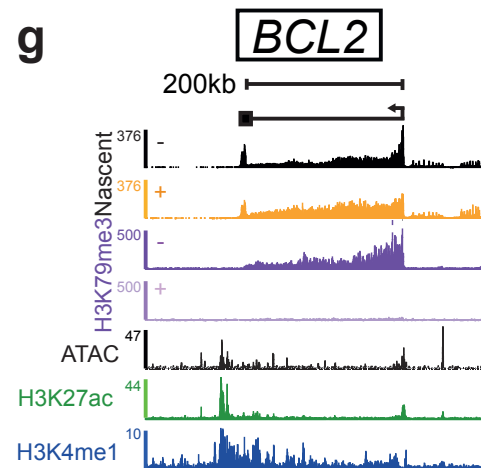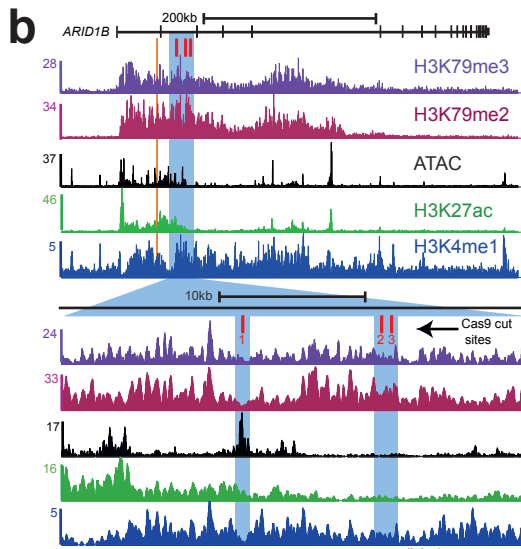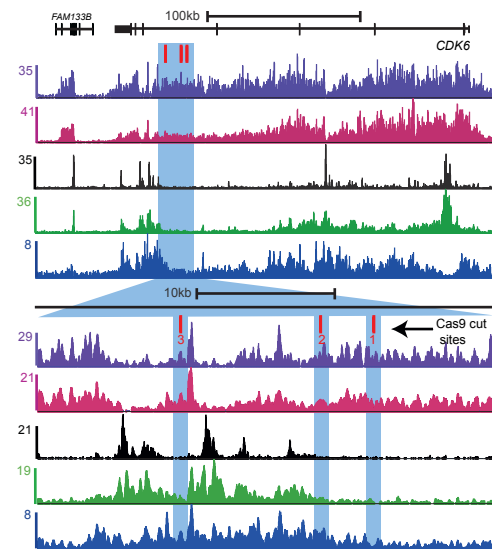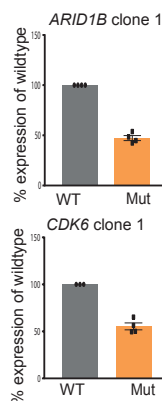

**ARID1B clone 1**

WT GGCTGCTGGACTCACTGGTATTCCCCAGGCTGGAAGTGGCTCTCCGTTACAGGGCAGCCACAGCTGTCTGGTGA

mut allele 1 GGCTGCTGGACTCACTGGTATTCCCCAGGCTGGAAGTGGCTCTCCGTT

**Cut site 2**

WT ACAGAGTGAGAGAATCCGTATCAAAAAGCAGCCTGATGTTGTGACTCACACCCATAATCCAGCACTTTGGAGGCTGA

mut allele 1 ACAGAGTGAGAGAATCCGTATCAAAAAGCAGCCTGATGTTGTGACTCACACCCATAATCCAGCACTTTGGAGGCTGA

**Cut site 3**

WT GGAGGGGAGGAACATGGGGGAAATGCCCTTAAAACGGCTAAGCAGCAATAGATACCTTGAGTCATTTACCCCTCCA

mut allele 1 GGAGGGGAGGAACATGGGGGAAATGCCCTTAAAACGGCTAAGCAGCAATAGATACCTTGAGTCATTTACCCCTCCA

mut allele 2 GGAGGGGAGGAACATGGGGGAAATGCCCTTAAAACGGCTAAGCAGCAATAGATACCTTGAGTCATTTACCCCTCCA

**CDK6 clone 1**

WT GCAACATCCTCGTCAGCACTTCTGGTCCAGATTCAAAGGTATGCGTACTTCTTGGACCTGCTACTCTCCATCTTTTCT

mut allele 1 GCAACATCCTCGTCAGCACTTCTGGTCCAGATTCAAAGGTATGCGTACTTCTTGGACCTGCTACTCTCCATCTTTTCT

mut allele 2 GCAACATCCTCGTCAGCACTTCTGGTCCAGATTCAAAGGTATGCGTACTTCTTGGACCTGCTACTCTCCATCTTTTCT

**Cut site 2**

WT ATTTCTATACATCTCCTTTAAGAATGCCACAGGTTTTCCGGATTCTTATCTGGATGGAGCTCTCAATTTCTGAACCTTGACT

mut allele 1 ATTTCTATACATCTCCTTTAAGAATGCCACAGGTTTTCCGGATTCTTATCTGGATGGAGCTCTCAATTTCTGAACCTTGACT

mut allele 2 ATTTCTATACATCTCCTTTAAGAATGCCACAGGTTTTCCGGATTCTTATCTGGATGGAGCTCTCAATTTCTGAACCTTGACT

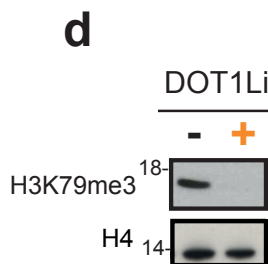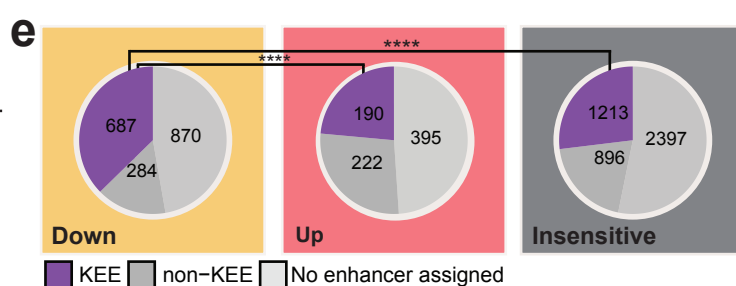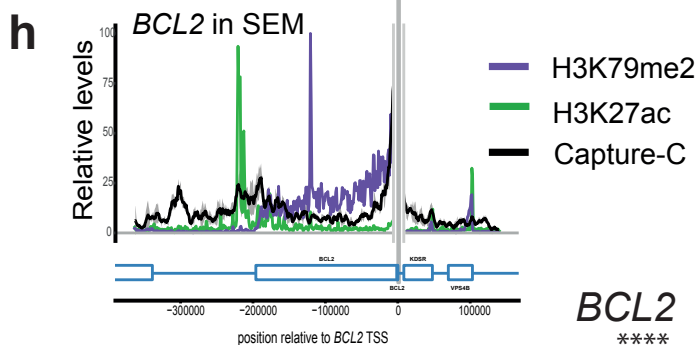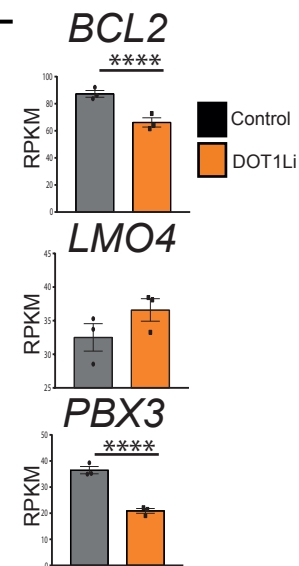

**Supplementary Figure 2.** Loss of H3K79me<sub>2/3</sub> leads to a reduction in transcription at KEE-genes **(a)** Luciferase assay for putative enhancer activity. pGL3 plasmid containing promoter alone, or sections of the *ARID1B* KEE, *JMJD1C* KEE or *BCL2* non-KEE were co-transfected with pRL-TK *Renilla* into 293T cells. Firefly luciferase activity was normalised to *Renilla* luciferase. Error bars represent s.e.m of three technical replicates. **(b)** Upper: Locations of gRNA cut sites at *ARID1B* and *CDK6* KEEs (red lines) and *ARID1B* luciferase enhancer (orange line). Lower: Sequence of an *ARID1B* mutant and *CDK6* mutant clone compared to WT, characterised using PCR and Sanger sequencing. Solid red bars below the ChIP-seq traces show the deleted regions. Left: RT-qPCR analysis of *ARID1B* and *CDK6* expression in the indicated clones relative to WT SEM cells, mean of at least three replicates. Error bars represent s.e.m. **(c)** H3K79me<sub>3</sub> and H3K79me<sub>2</sub> ChIP qPCR in control (dark shade) and DOT1Li (light shade) SEM cells at KEE genes and negative control locus. Error bars represent s.e.m (n=3). **(d)** Western blot analysis of H3K79me<sub>3</sub> and H4 in control (-) and DOT1Li (+) SEM cells. Representative of three biological replicates. **(e)** Proportion of DOT1Li downregulated, upregulated or insensitive genes associated with a KEE, non-KEE or no enhancer. \*\*\*\* = p<0.0001, Fisher's exact test. **(f)** RT-qPCR of total RNA in control (black) and DOT1Li (orange) SEM cells at *ARID1B*, *BCL2*, *CDK6* and *BCL11A*, normalised to the housekeeping gene *YWHAZ*. Error bars represent s.d (n=3). **(g)** Left: Nascent RNA-seq at *BCL2*, *LMO4* and *PBX3* in control (black, -) and DOT1Li (orange, +) conditions performed in SEM cells, H3K79me<sub>3</sub> ChIP-rx in control (purple, -) and DOT1Li (orange, +) conditions, ATAC-seq, H3K27ac and H3K4me<sub>1</sub> ChIP-seq. Right: Bar charts showing nascent RNA-seq RPKM values at *BCL2*, *LMO4* and *PBX3* in Control (black) and DOT1Li (orange) conditions. Error bars represent s.d from 3 biological replicates. For p-values see Supplementary Table 2. **(h)** Overlay of Capture-C with H3K79me<sub>2</sub> and H3K27ac ChIP-seq at *BCL2* in SEM cells. Gray bars represent location of Capture-C probe, +/-1 kb exclusion zone. Source data are provided as a source data file.

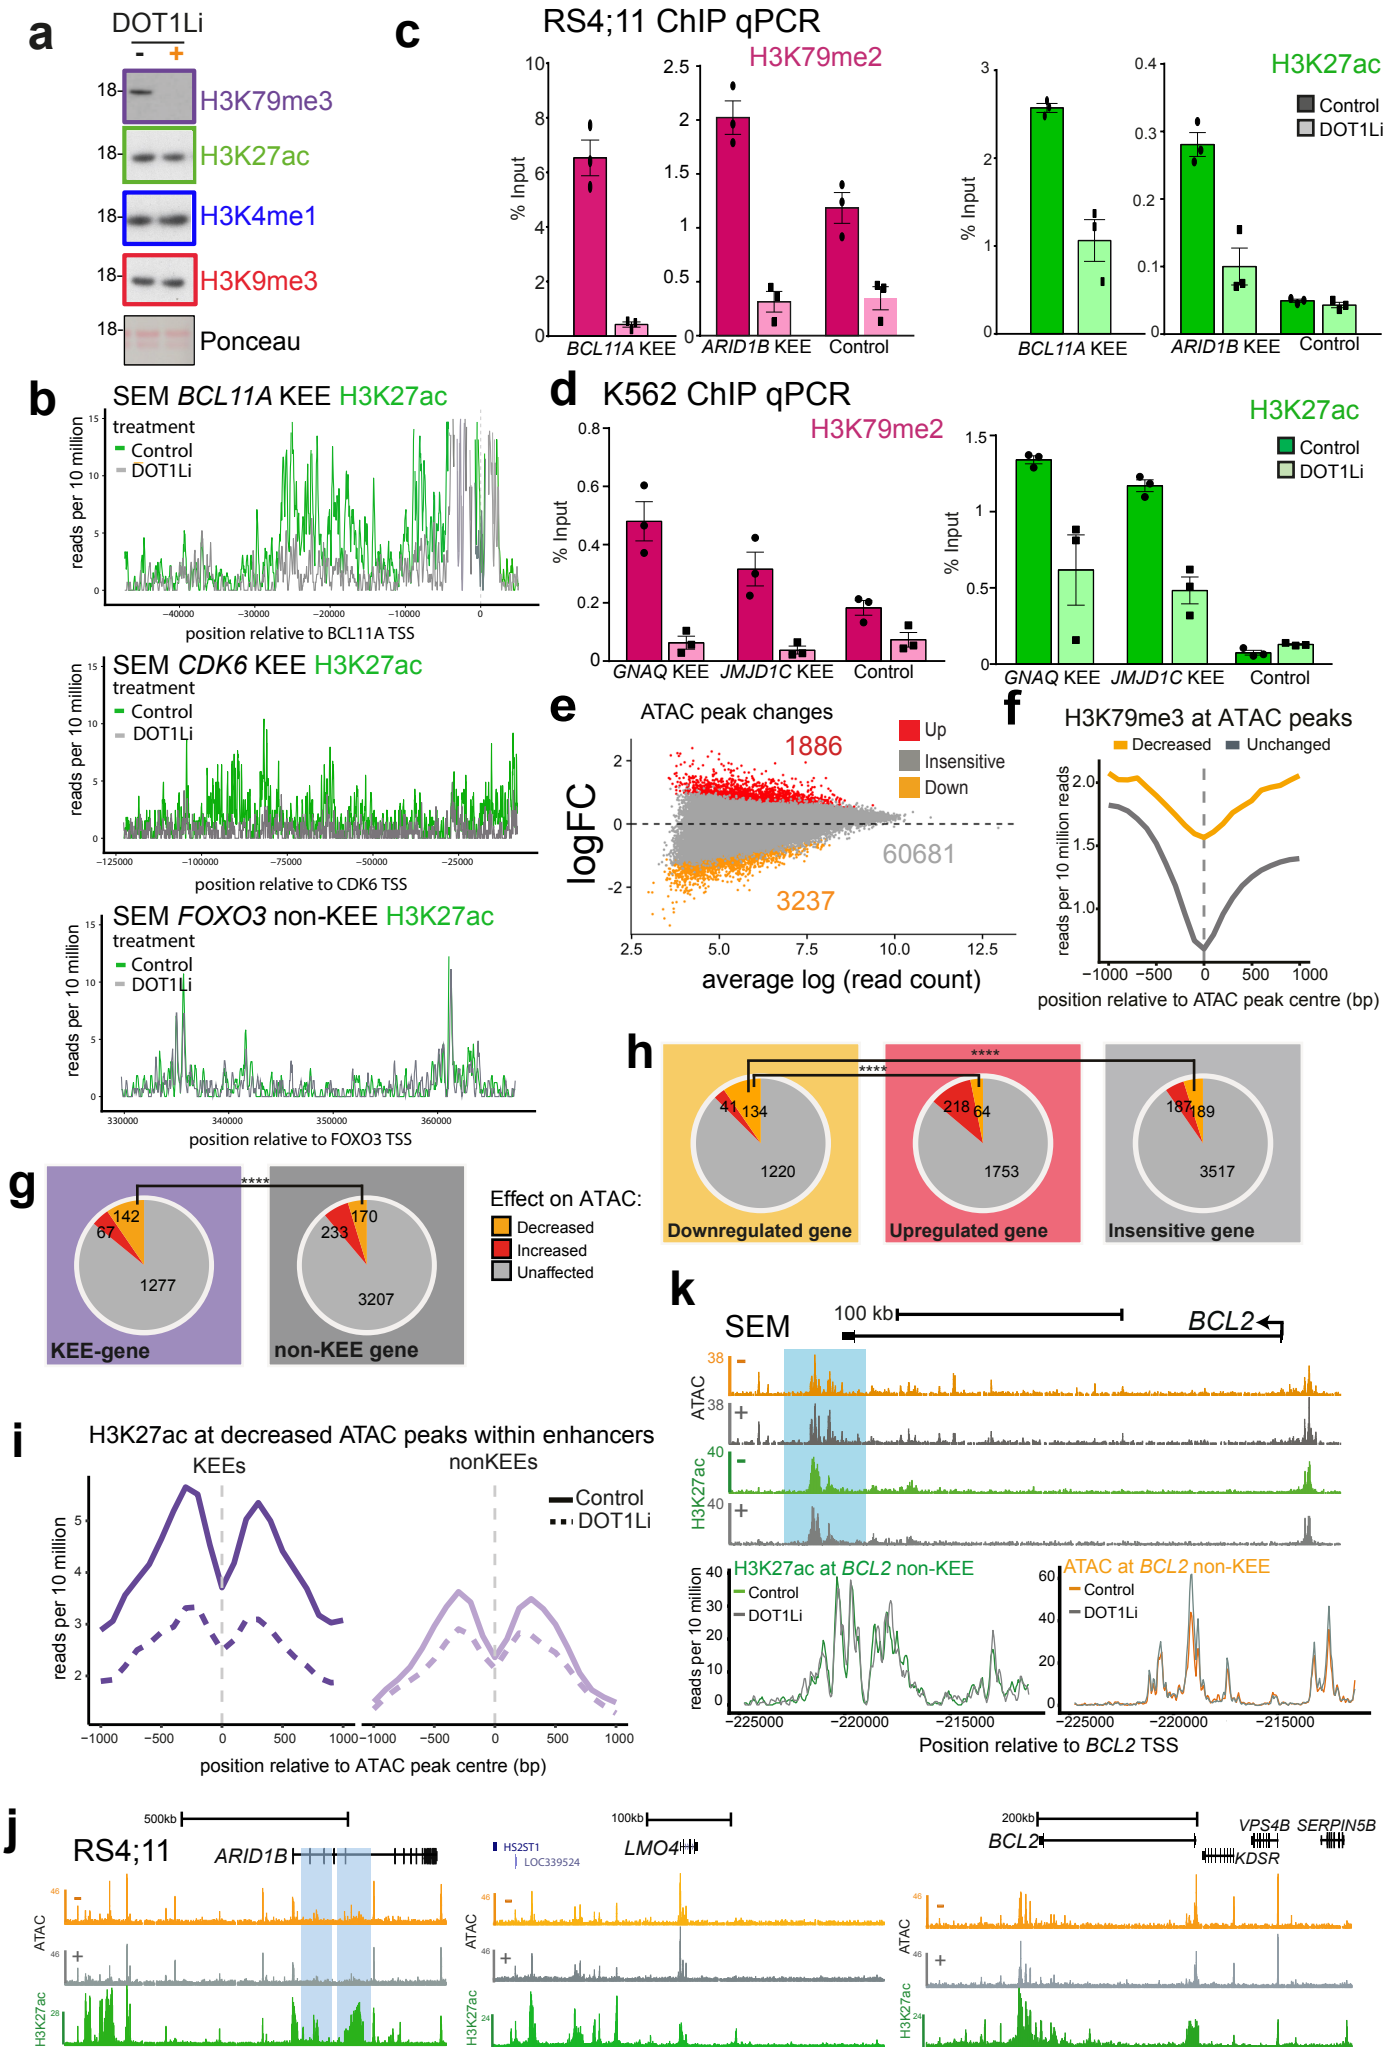

**Supplementary Figure 3.** Loss of H3K79me2/3 leads to reduction in active histone modifications and chromatin accessibility at KEEs **(a)** Western blot analysis of acid-extracted histones from SEM cells in control (-) and DOT1Li (+) conditions. **(b)** Overlay of H3K27ac ChIP-seq in control (green) and DOT1Li (gray) at *BCL11A*, *CDK6* KEE and *FOXO3* non-KEE region. **(c)** H3K79me2 and H3K27ac ChIP qPCR in RS4;11 cells at KEE-associated genes in control (darker shade) and DOT1Li (lighter shade) conditions. n=3, error bars represent s.e.m. **(d)** H3K79me2 and H3K27ac ChIP qPCR in K562 cells at KEE-associated genes in control (darker shade) and DOT1Li (lighter shade) conditions. n=3, error bars represent s.e.m. **(e)** MA plot representing up (red, 1886), down (orange, 3237) and insensitive (gray, 60681) ATAC peaks following DOT1Li, FDR <0.05, based on five biological replicates. **(f)** Metaplot of H3K79me3 ChIP-seq signal from control SEM cells centered around DOT1Li-decreased (orange) and unchanged (gray) ATAC peaks. **(g)** Proportion of ATAC peaks within KEE genes or non-KEE genes that show increases (red), decreases (orange) or no change (gray) following DOT1Li. \*\*\*\* = p <0.0001, Fisher's exact test. **(h)** Proportion of ATAC peaks within DOT1Li transcriptionally downregulated, upregulated and insensitive genes that show increases (red), decreases (orange) or no change (gray) following DOT1Li. \*\*\*\* = p <0.0001, Fisher's exact test. **(i)** Metaplot of H3K27ac ChIP-seq levels at DOT1Li-decreased ATAC peaks found within KEEs and non-KEEs. H3K27ac levels at these regions were measured from control (solid line) and DOT1Li (dashed line) SEM cells. **(j)** ATAC-seq in control (orange) and DOT1Li (gray) conditions and H3K27ac ChIP-seq (green) in RS4;11 cells at *ARID1B*, *LMO4* and *BCL2*. Blue boxes at *ARID1B* represent regions where reductions in ATAC correspond to those observed in SEM cells. **(k)** Upper: ATAC-seq and H3K27ac ChIP-seq in control (orange/green) and DOT1Li (gray) SEM cells at *BCL2*. Highlighted blue regions represent region represented in H3K27ac and ATAC-seq overlays below. Lower: Overlay of H3K27ac (left) and ATAC (right) signal at *BCL2* non-KEE in control (green/orange) and DOT1Li (gray) SEM cells. Source data are provided as a source data file.

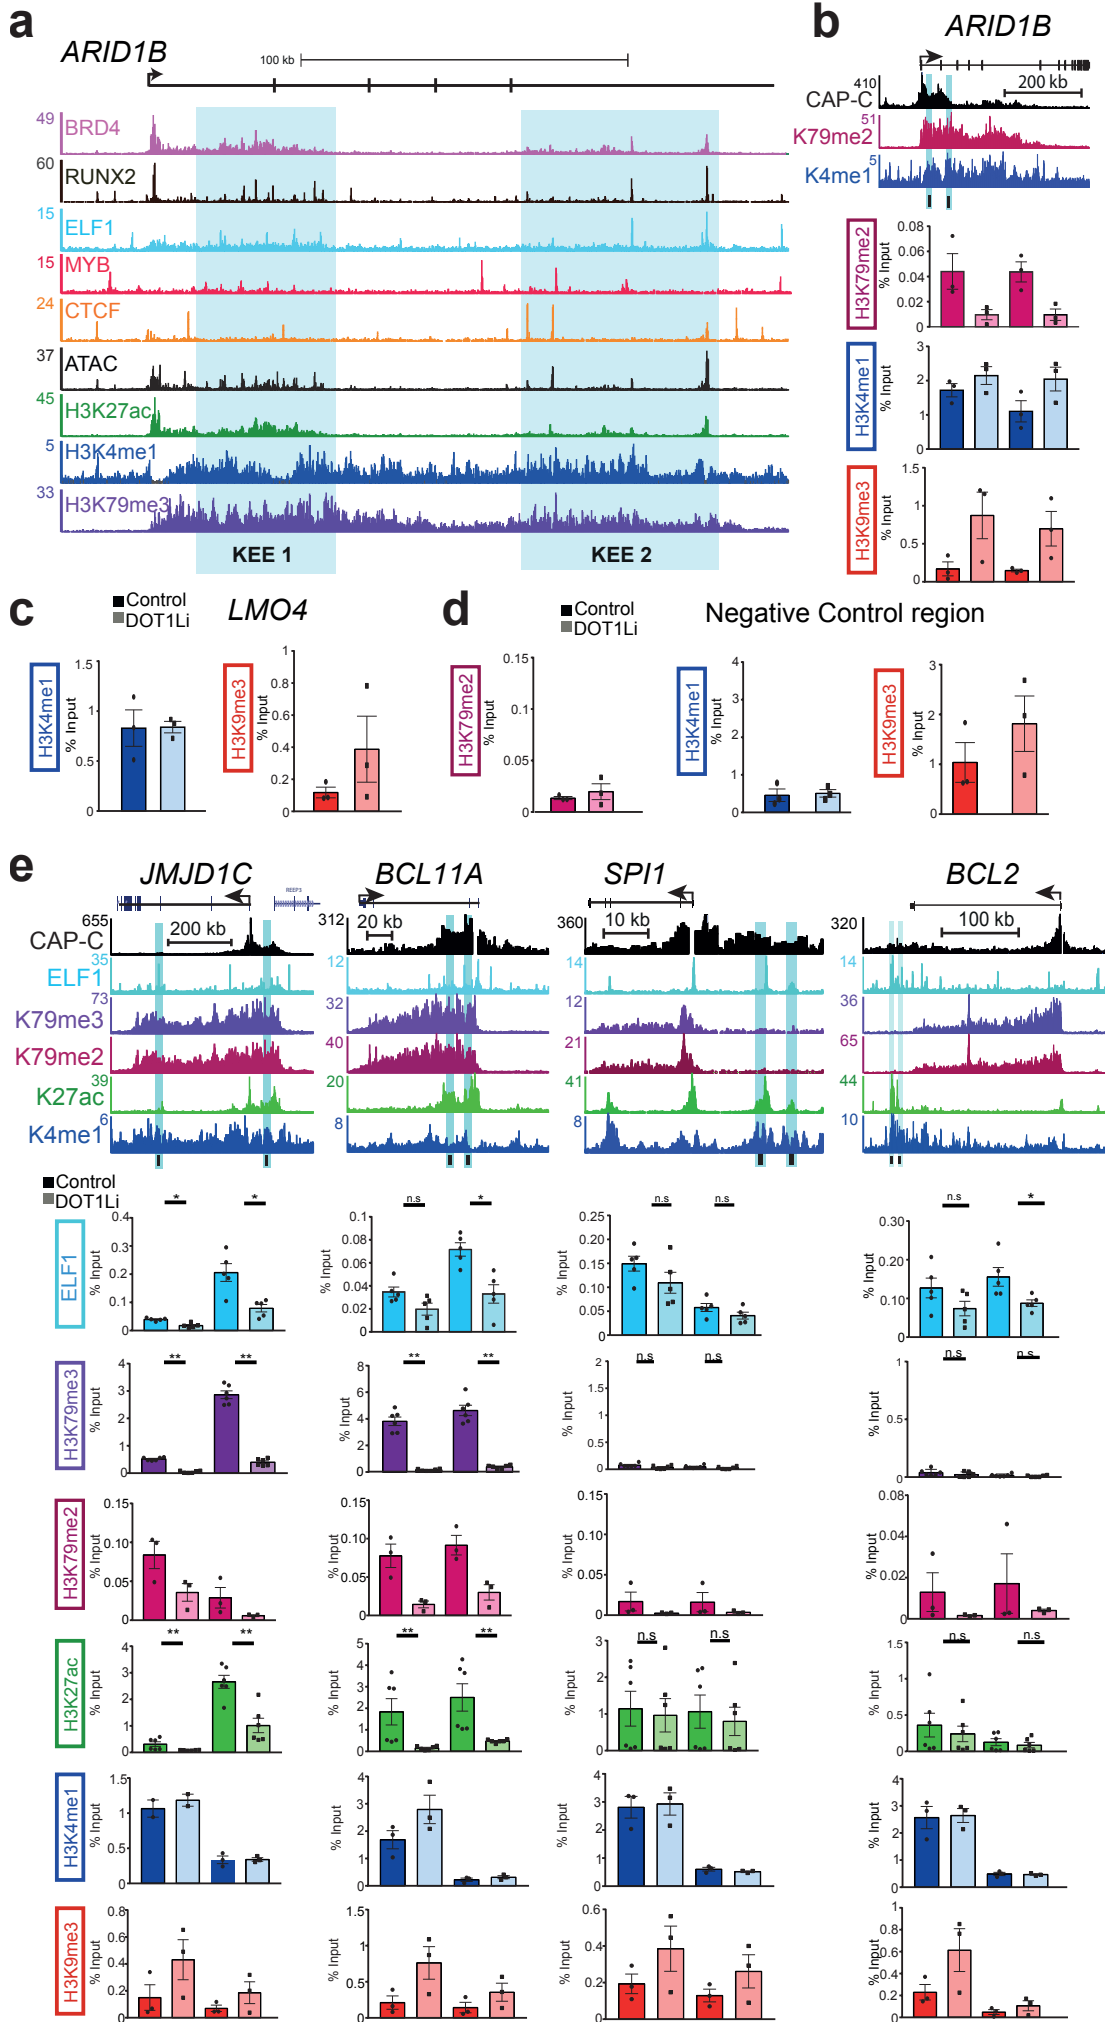



**Supplementary Figure 4.** Loss of H3K79me<sub>2/3</sub> leads to a reduction in ELF1 binding at KEEs

**(a)** ChIP-seq at *ARID1B* demonstrating multiple transcription factor binding events at KEEs in SEM cells. **(b)** H3K79me<sub>2</sub>, H3K4me<sub>1</sub> and H3K9me<sub>3</sub> ChIP qPCR at *ARID1B* in SEM cells in control (darker shade) and DOT1Li (lighter shade) conditions. **(c)** H3K4me<sub>1</sub> and H3K9me<sub>3</sub> ChIP qPCR at *LMO4* in control (darker shade) and DOT1Li (lighter shade) conditions. Error bars represent s.e.m **(d)** H3K79me<sub>2</sub>, H3K4me<sub>1</sub> and H3K9me<sub>3</sub> ChIP qPCR at negative control region in control (darker shade) and DOT1Li (lighter shade) conditions. Error bars represent s.e.m **(e)** ChIP qPCR at KEEs and non-KEEs for ELF1, H3K79me<sub>3</sub>, H3K79me<sub>2</sub>, H3K27ac, H3K4me<sub>1</sub> and H3K9me<sub>3</sub> in control (darker shade) and DOT1Li (lighter shade) SEM cells. n=6, error bars represent s.e.m. Statistical test used Mann Whitney U test, \* = p<0.05, \*\* = p<0.01, n.s. = non-significant. Source data are provided as a source data file.

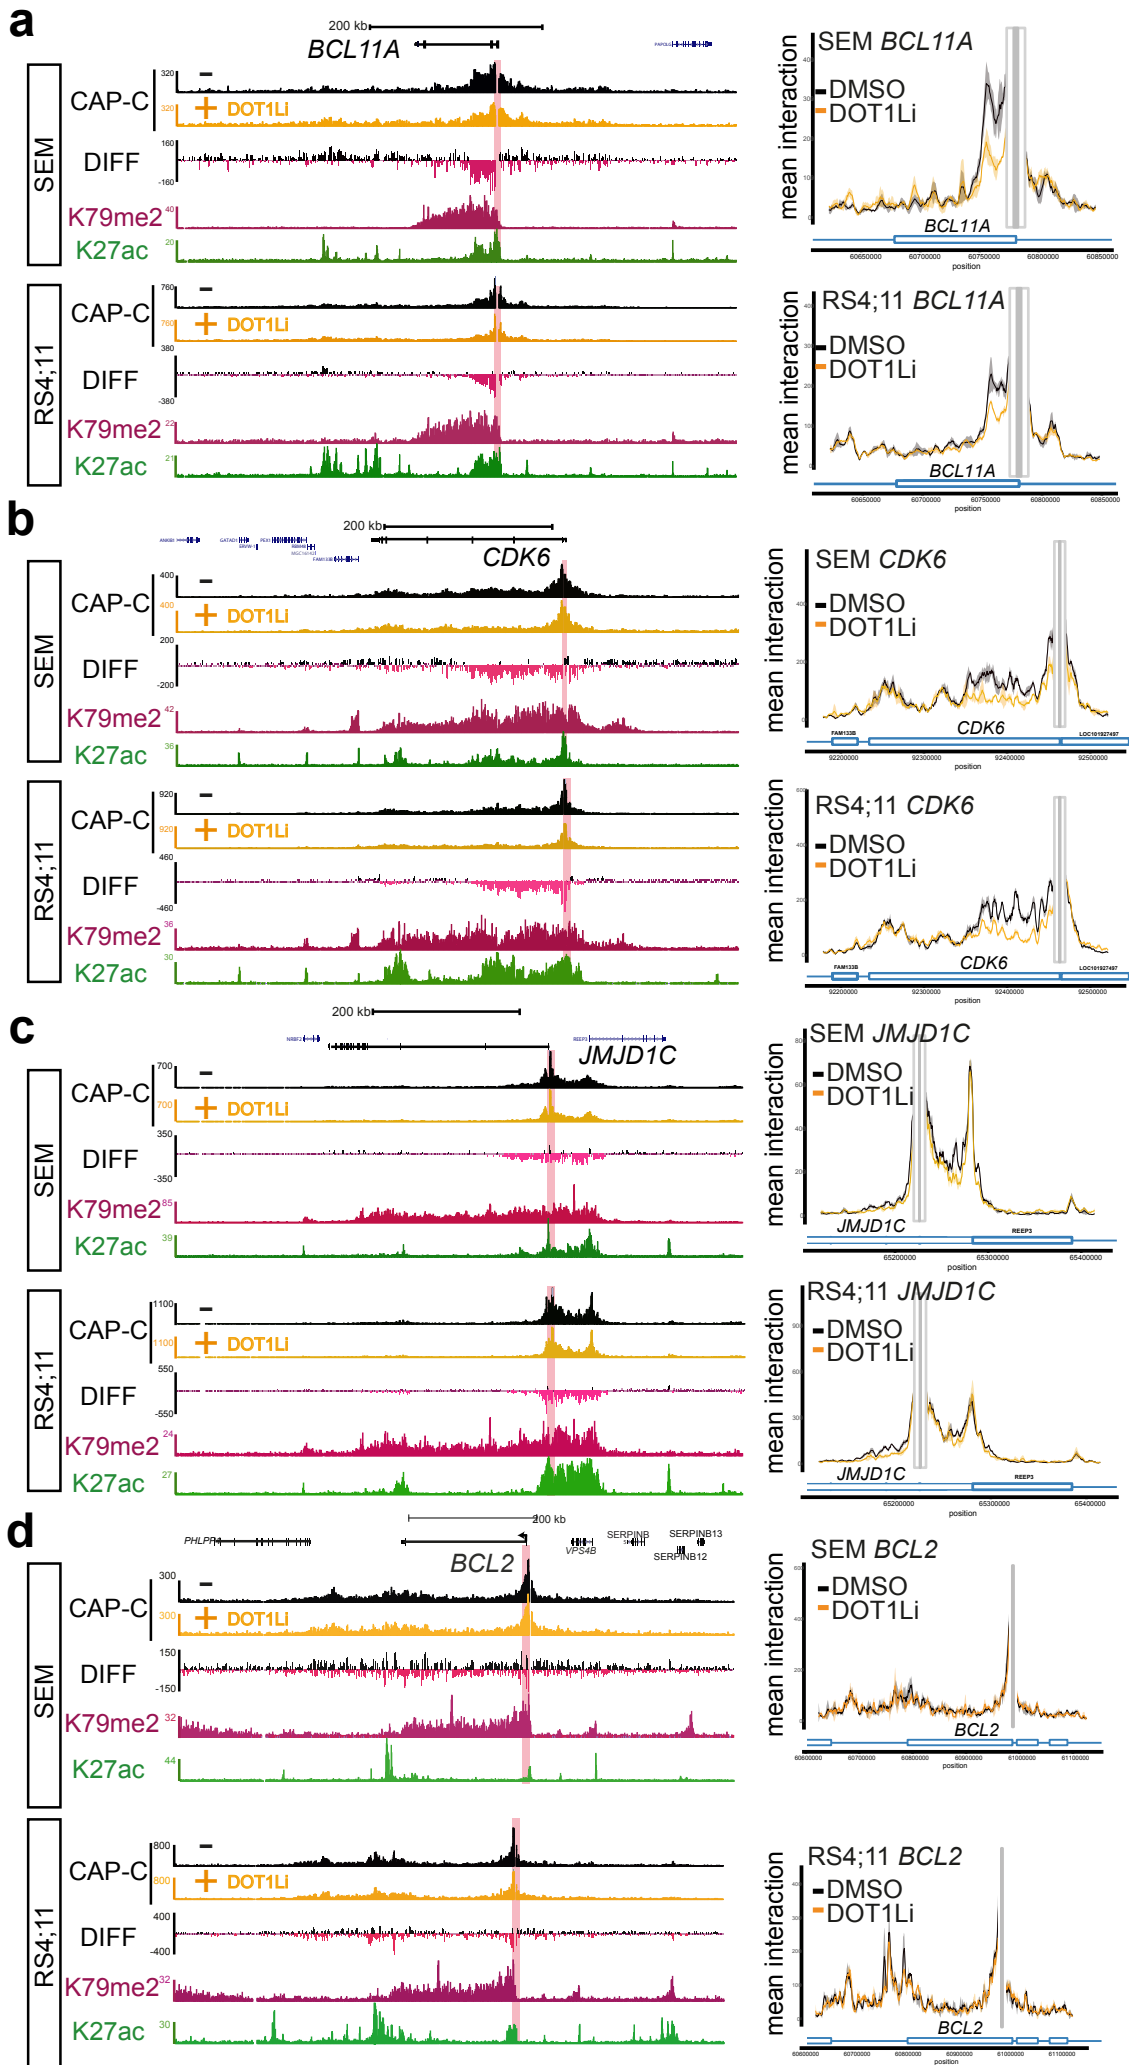

**Supplementary Figure 5.** Loss of H3K79me<sub>2/3</sub> leads to a reduction in KEE-promoter interactions at *ARID1B* but not non-KEE-promoter interactions at *LMO4* (**a-d**) Capture-C from the promoter of *BCL11A*, *CDK6*, *JMJD1C* and *BCL2* in control (black) and DOT1Li (orange) treatment, in SEM (upper) and RS4;11 (lower) cells, n=3. Left: Differential track demonstrates difference in signal between control and DOT1Li: increase (black), decrease (pink). ChIP-seq tracks for H3K79me<sub>2</sub> and H3K27ac. Right: overlay of control (black) and DOT1Li (orange) Capture-C signal across each gene. Gray bars represent location of Capture-C probe, +/-1 kb exclusion zone. Shaded area around Capture-C signal represents 1 s.d.

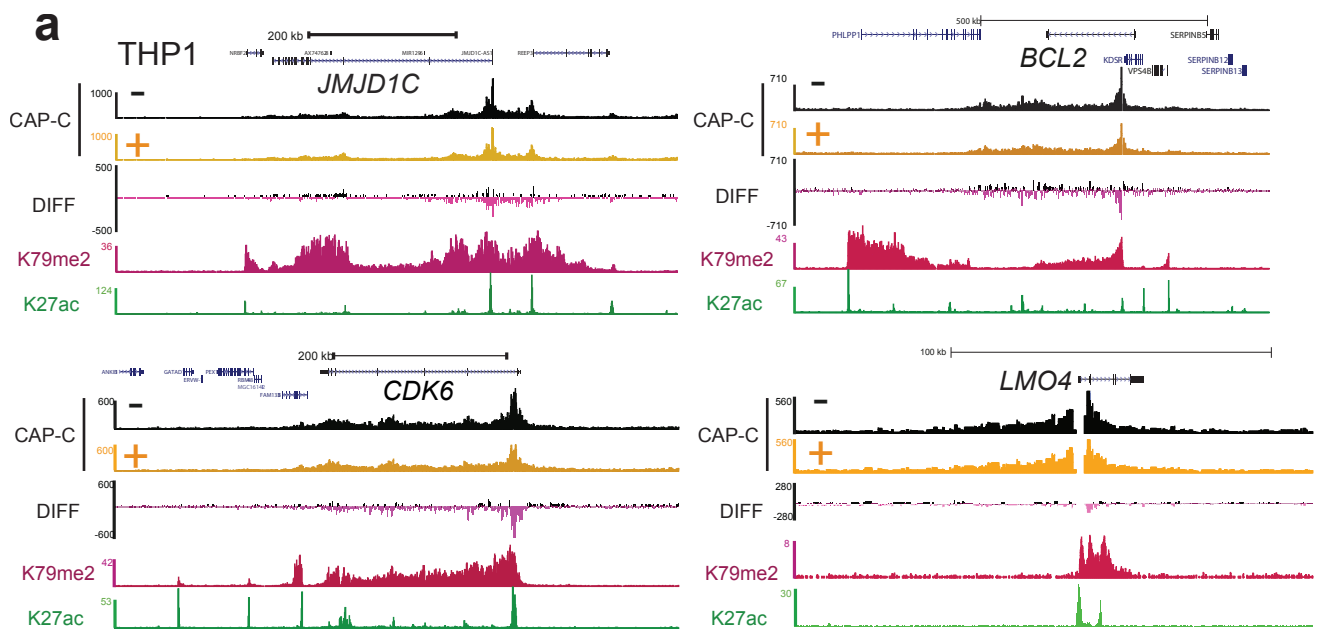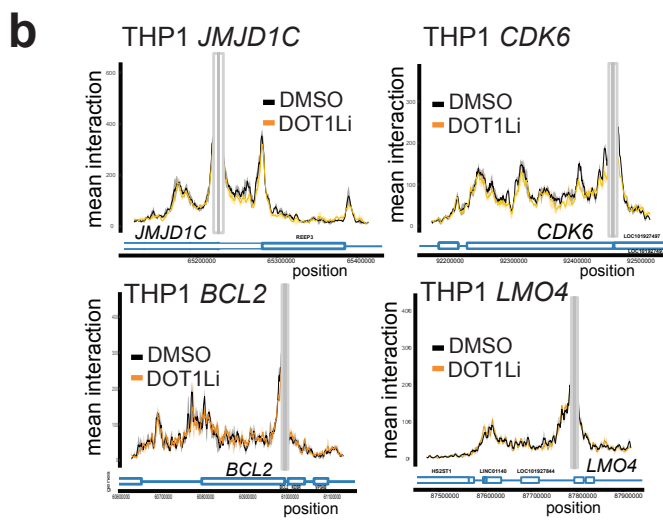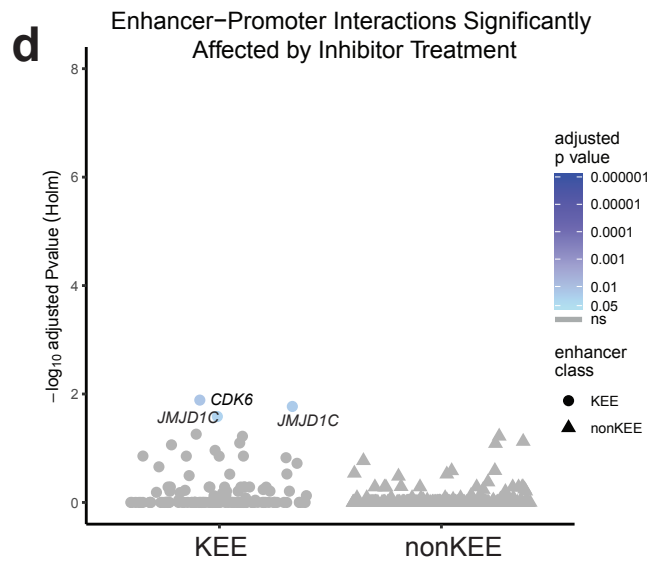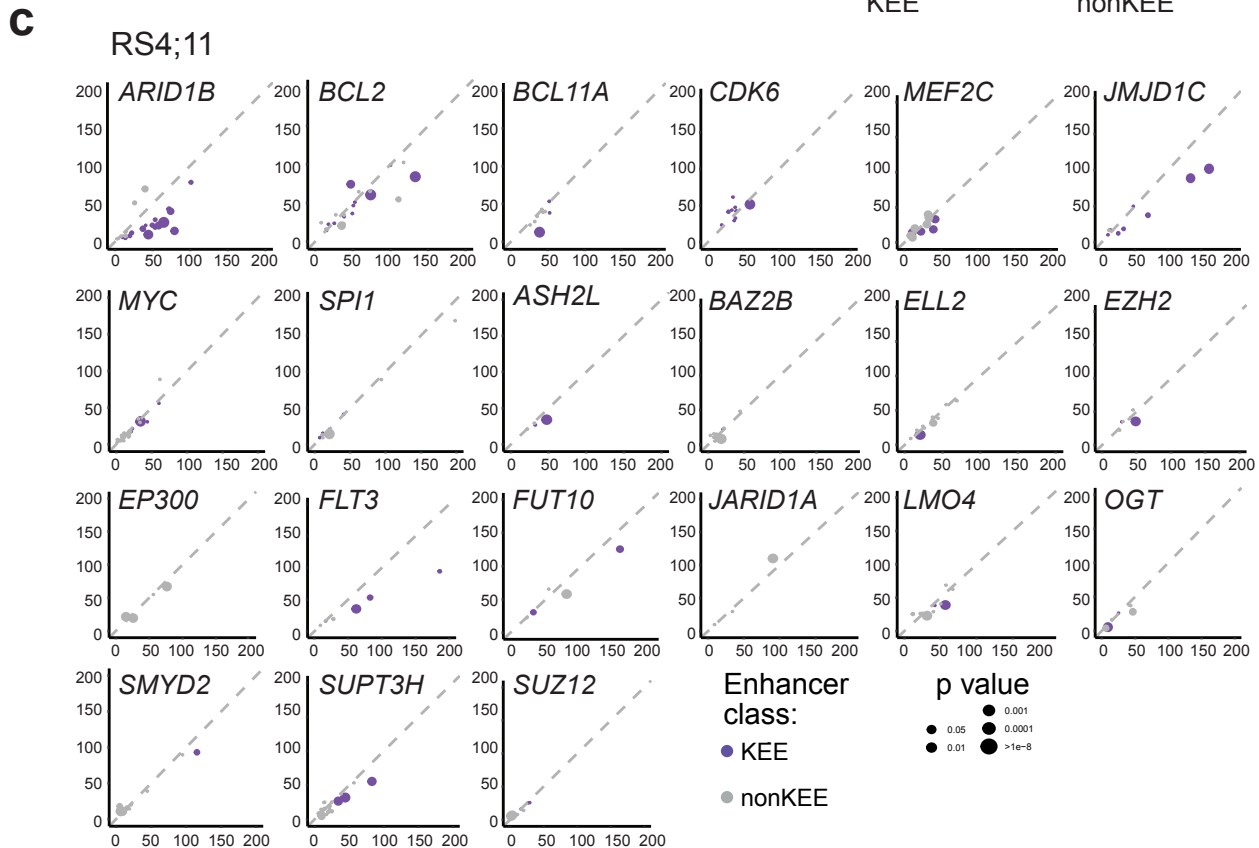

**Supplementary Figure 6.** Loss of H3K79me2/3 leads to specific reductions in KEE-promoter interactions at a large number of genes **(a)** Capture-C from the promoter of *JMJD1C*, *CDK6*, *BCL2* and *LMO4* in control (black) and DOT1Li (orange) treatment performed in triplicate in THP1 cells. Differential track (increases (black), decreases (pink)) demonstrates difference in signal between control and DOT1Li. ChIP-seq tracks for H3K79me2 and H3K27ac. **(b)** Overlay of control (black) and DOT1Li (orange) Capture-C signal (average of three biological replicates) across *JMJD1C*, *CDK6*, *BCL2* and *LMO4* in THP1 cells. Gray bars represent location of Capture-C probe, +/-1 kb exclusion zone. **(c)** Enhancer-promoter Capture-C interaction frequencies in Control (x-axis) and DOT1Li (y-axis) RS4;11 cells. Each point represents the interaction of a KEE (purple) or non-KEE (gray) with the indicated gene promoter. Size of dot corresponds to significance of change in interaction, using a Wilcoxon rank test. See Supplementary Table 6 for list of p values. **(d)** Statistical analysis of the significance of the change in enhancer-promoter Capture-C interactions following DOT1Li in THP1 cells. Each point represents the interaction of a KEE (circle) or non-KEE (triangle) with a gene promoter. Significantly affected interactions are labelled with the relevant gene promoter. Holm-Bonferroni adjusted p-values were calculated following a Wilcoxon rank test (n=3).

| Primer name                      | Sequence                                                     |
|----------------------------------|--------------------------------------------------------------|
| ARID1B KEE1 F primer             | TTTCCAGTTCCGTCCAAGTATT                                       |
| ARID1B KEE1 R primer             | CTTTCTCCCAGCTTCCTGTTAG                                       |
| ARID1B KEE2 F primer             | CTAACAGGAAGCTGGGAGAAAAG                                      |
| ARID1B KEE2 R primer             | GCTTCTTGCTTAAGGCGTTTC                                        |
| BCL11A KEE1 F primer             | GCAAGCCAGGAAAGATGATAGA                                       |
| BCL11A KEE1 R primer             | AGAGACGCACAGCTCAATTT                                         |
| BCL11A KEE2 F primer             | ACACCCAGTGCCCAGAATTG                                         |
| BCL11A KEE2 R primer             | CGCGGGTCCTGAGATTCATT                                         |
| JMJD1C KEE1 F primer             | CTTCCAGCACGAGTCACATTA                                        |
| JMJD1C KEE1 R primer             | CTCGCCACTAGTCTGTCTTTG                                        |
| JMJD1C KEE2 F primer             | CAAGGTACGTCTGCGAGAG                                          |
| JMJD1C KEE2 R primer             | CGTGTCACACAGGGACAG                                           |
| SPI-1 non-KEE1 F primer          | TAACAGCTTCCGCCAAGAG                                          |
| SPI1 non-KEE1 R primer           | CGCAGAGTTGAGACCAGAG                                          |
| SPI-1 non-KEE2 F primer          | GCCAAACACTAGGTCAGAGAAA                                       |
| SPI1 non-KEE2 R primer           | CCTACTTTGGCCACCCTTAAA                                        |
| BCL2 non-KEE1 F primer           | CTTCACGCAGCATCCATTTG                                         |
| BCL2 non-KEE1 R primer           | CCAATTCAGCATCTAGTTCTCCT                                      |
| BCL2 non-KEE2 F primer           | CCGGCATCTGAGCTAATTACA                                        |
| BCL2 non-KEE2 R primer           | TCTGCCCAGTACCTCTTATCT                                        |
| PROM1 intron 1 F primer          | GGTGACACAATTCAACCCATAAC                                      |
| PROM1 intron 1 R primer          | CATGGGTCTTTAGTTGGTGTAGTA                                     |
| GNAQ F primer                    | GTCCATCATGGCGTGCT                                            |
| GNAQ R primer                    | CGGACGGTACTCACCGA                                            |
| Negative control F primer        | GGCTCCTGTAACCAACCACTACC                                      |
| Negative control R primer        | CCTCTGGGCTGGCTTCATTC                                         |
| BCL2en luciferase assay F primer | ATGCATCGATGTCTTCACAGCCGTCATCCT                               |
| BCL2en luciferase assay R primer | ATGCGCGGCCGCGCCAATGACATACGACAGC                              |
| ARID1B KEE luciferase assay F    | GGTGTGAGAAGTTGGGGCTA                                         |
| ARID1B KEE luciferase assay R    | GCTTGCTCCTAGGAAATACACC                                       |
| JMJD1C KEE luciferase assay      | AAATCGATAAGGATCCAGCTTGAAAATATCTTTCCATAATTTCTACTCTATTA<br>CAC |
| JMJD1C KEE luciferase assay      | AAGGGCATCGGTGATTGCTATAGGGATTTGGGTACTGATGC                    |
| YWHAZ Taqman probe mix           | Hs03044281_g1                                                |
| ARID1B Taqman probe mix          | Hs00368175_m1                                                |
| CDK6 Taqman probe mix            | Hs01026371_m1                                                |
| BCL2 Taqman probe mix            | Hs00608023_m1                                                |
| BCL11A Taqman probe mix          | Hs01093197_m1                                                |

**Supplementary Table 1.** List of primers used.

| Experiment      | Cell line | Antibody | Accession Number |
|-----------------|-----------|----------|------------------|
| ChIP seq        | SEM       | H3K27ac  | GSE74812         |
| ChIP seq        | SEM       | H3K79me2 | GSE74812         |
| ChIP seq        | SEM       | H3K79me3 | GSE74812         |
| ChIP seq        | SEM       | H3K4me1  | GSE74812         |
| ChIP seq        | SEM       | H3K4me3  | GSE74812         |
| ChIP seq        | SEM       | BRD4     | GSE83671         |
| ChIP seq        | RS4;11    | H3K79me2 | GSE38403         |
| ChIP seq        | RS4;11    | H3K27ac  | GSE71616         |
| ChIP seq        | RS4;11    | H3K4me1  | GSE71616         |
| ChIP seq        | RS4;11    | H3K4me3  | GSE71616         |
| ChIP seq        | ML-2      | H3K79me2 | GSE83671         |
| ChIP seq        | K562      | H3K27ac  | GSE29611         |
| ChIP seq        | K562      | H3K79me2 | GSE29611         |
| ChIP seq        | K562      | H3K4me1  | GSE31755         |
| ChIP seq        | K562      | H3K4me3  | GSE96303         |
| ChIP seq        | GM12878   | H3K27ac  | GSE29611         |
| ChIP seq        | GM12878   | H3K79me2 | GSE29611         |
| ChIP seq        | GM12878   | H3K4me1  | GSE29611         |
| ChIP seq        | GM12878   | H3K4me3  | GSE29611         |
| ChIP seq        | HeLa-S3   | H3K27ac  | GSE29611         |
| ChIP seq        | HeLa-S3   | H3K79me2 | GSE29611         |
| ChIP seq        | HeLa-S3   | H3K4me1  | GSE29611         |
| ChIP seq        | HeLa-S3   | H3K4me3  | GSE29611         |
| ChIP seq        | H1-hESC   | H3K27ac  | GSE16256         |
| ChIP seq        | H1-hESC   | H3K79me2 | GSE16256         |
| ChIP seq        | H1-hESC   | H3K4me1  | GSE16256         |
| ChIP seq        | H1-hESC   | H3K4me3  | GSE16256         |
| Nascent RNA seq | SEM       |          | GSE83671         |
| PolyA RNA seq   | K562      |          | GSE88351         |
| PolyA RNA seq   | GM12878   |          | GSE88583         |
| PolyA RNA seq   | HeLa-S3   |          | GSE33480         |
| PolyA RNA seq   | H1-hESC   |          | GSE16256         |

**Supplementary Table 2.** GEO accession numbers: datasets from previous publications.
